# Supplementary material
Source: PubMed Central journal article supplement (PMC9159062)

## Supplementary Materials

**Supplementary Table 1.** Means and standard deviations for all DT variables.

| Characteristic | PRE              |                  |                  | POST             |                  |                  |
|----------------|------------------|------------------|------------------|------------------|------------------|------------------|
|                | AET              | GMA              | COG              | AET              | GMA              | COG              |
| DT SP RT       | 845.69 (81.09)   | 892.67 (123.61)  | 852.96 (98.10)   | 839.17 (109.63)  | 775.32 (103.74)  | 818.59 (90.15)   |
| DT SM RT       | 977.22 (122.52)  | 1014.88 (140.98) | 966.55 (110.16)  | 974.86 (153.42)  | 878.96 (120.53)  | 937.42 (111.64)  |
| DT DM RT       | 1577.24 (171.35) | 1619.82 (213.89) | 1561.78 (179.60) | 1529.17 (222.52) | 1425.09 (186.66) | 1453.91 (155.98) |
| DT SP Error %  | 2.05 (2.64)      | 2.02 (3.16)      | 1.38 (1.75)      | 2.70 (3.45)      | 1.20 (1.80)      | 1.63 (2.09)      |
| [range]        | [0 – 11]         | [0 – 7]          | [0 – 13]         | [0 -13]          | [0 -7]           | [0 – 7]          |
| DT SM Error %  | 1.71 (1.83)      | 2.44 (2.91)      | 1.28 (2.00)      | 1.83 (2.91)      | 1.28 (2.09)      | 1.52 (2.05)      |
| [range]        | [0-6]            | [0 – 8]          | [0 – 12]         | [0 -13]          | [0 – 6]          | [0 – 8]          |
| DT DM Error %  | 5.83 (7.38)      | 4.83 (4.84)      | 5.09 (5.22)      | 5.30 (7.59)      | 3.51 (3.78)      | 3.05 (3.94)      |
| [range]        | [0 – 31]         | [0 – 14]         | [0 – 20]         | [0 – 37]         | [0 – 13]         | [0 -13]          |
| DT SP IIV      | 0.213 (0.046)    | 0.209 (0.063)    | 0.191 (0.046)    | 0.209 (0.053)    | 0.178 (0.036)    | 0.184 (0.035)    |
| DT SM IIV      | 0.232 (0.052)    | 0.228 (0.058)    | 0.225 (0.061)    | 0.227 (0.062)    | 0.191 (0.058)    | 0.208 (0.055)    |
| DT DM IIV      | 0.274 (0.035)    | 0.279 (0.035)    | 0.285 (0.034)    | 0.282 (0.036)    | 0.257 (0.041)    | 0.269 (0.030)    |

Abbreviations: DT: Dual Task; SP: Single Pure; SM: Single Mixed; DM: Dual Mixed; RT: Reaction Time; IIV: Intra Individual Variability;

Supplementary Figure 1. Sample Flowchart.

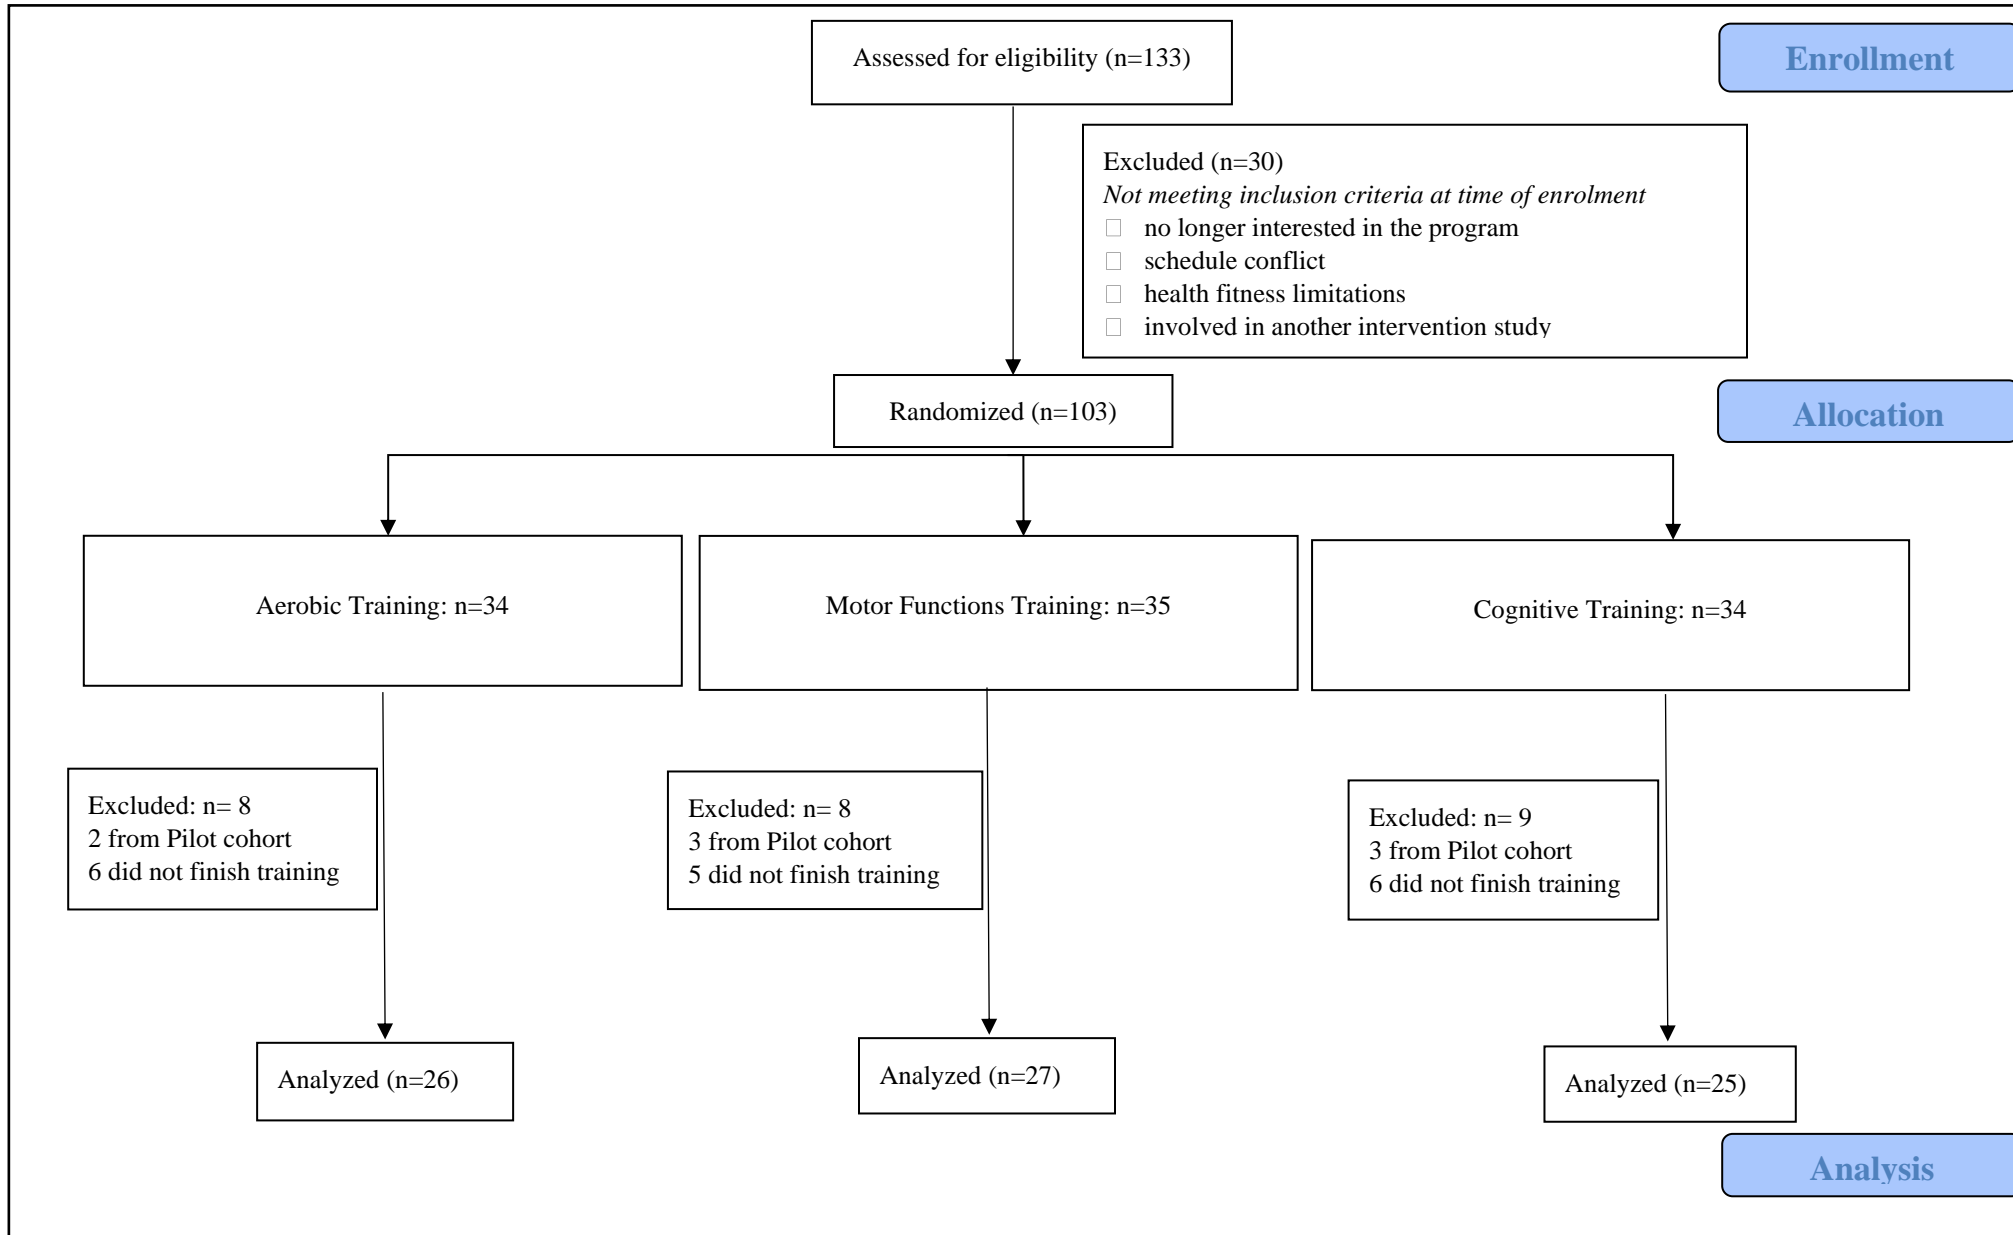

Supplement: gbab216_suppl_supplementary_material.pdf [file gbab216_suppl_supplementary_material.pdf]
